# Supplementary material for: Perturbations in the microbiota-gut-brain axis shaped by social status loss
Source: Springer Nature journal article supplement (doi:10.1038/s42003-025-07850-1), 2025-03-08
Supplement: MOESM1 [file 42003_2025_7850_MOESM1_ESM.pdf]

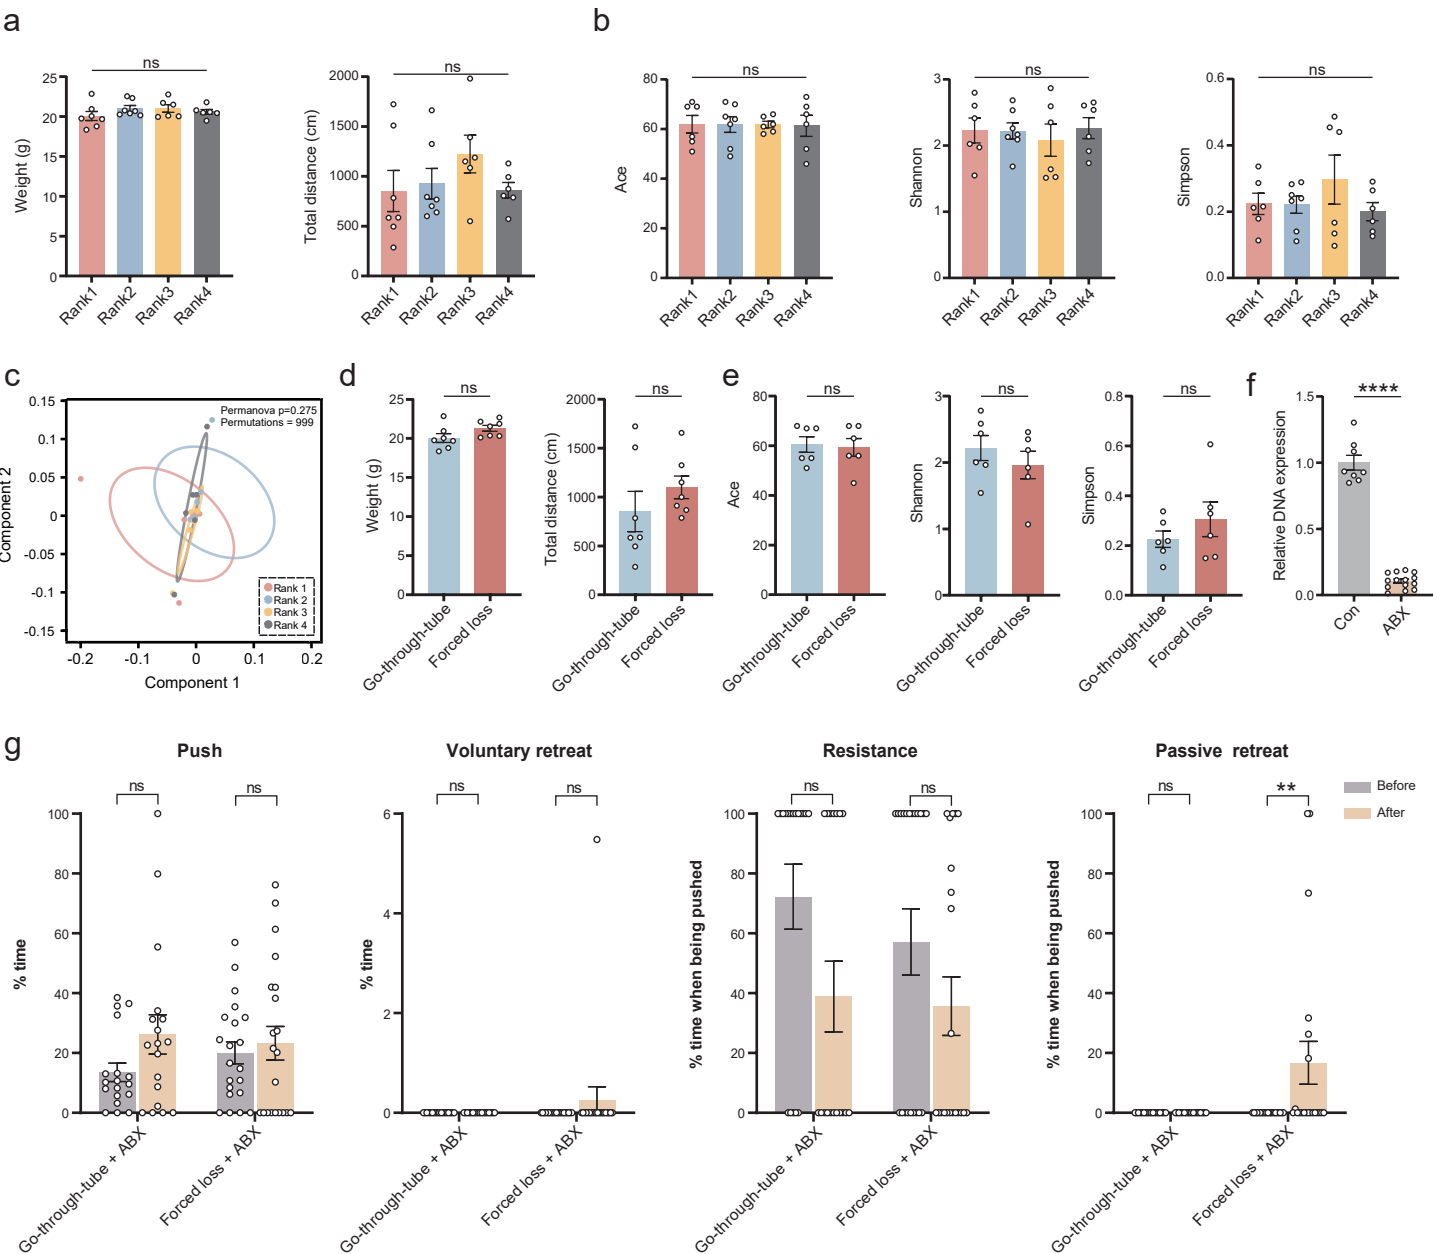

**Fig. S1: Changes in the diversity, richness, and composition of the gut microbiota in mice.**

**a** Body weights and total distances in the open field tests for mice with different ranks (Rank1,  $n = 7$ ; Rank2,  $n = 7$ ; Rank3,  $n = 6$ ; Rank4,  $n = 6$ ; Rank1 vs Rank2 vs Rank3 vs Rank4, no statistical difference in  $p$  values; data are mean  $\pm$  SEM; Kruskal-Wallis test, two-tailed)

**b** Alpha diversity indices of gut microbiota in mice with different ranks (Rank1,  $n = 6$ ; Rank2,  $n = 7$ ; Rank3,  $n = 6$ ; Rank4,  $n = 6$ ; Rank1 vs Rank2 vs Rank3 vs Rank4, no statistical difference in  $p$  values; data are mean  $\pm$  SEM; Wilcoxon rank-sum test, two-tailed).

**c** The overall characteristics of gut microbiota displayed using PCoA based on the abund\_jaccard distance, with internal differences analyzed by PERMANOVA test (permutations = 999,  $p = 0.275$ ).

**d** Body weights and total distances in the open field tests for mice in the go-through-tube and forced loss groups (Go-through-tube,  $n = 7$ ; Forced loss,  $n = 7$ ; Go-through-tube vs. Forced loss, no statistical difference in  $p$  values; data are mean  $\pm$  SEM; T test, two-tailed).

**e** Alpha diversity indices of the gut microbiota in go-through-tube mice and forced loss mice (Go-through-tube,  $n = 6$ ; Forced loss,  $n = 6$ ; Go-through-tube vs. Forced loss, no statistical difference in  $p$  values; data are mean  $\pm$  SEM; Wilcoxon rank-sum test, two-tailed).

**f** DNA expression of gut microbiota genes in the control and ABX groups (Con,  $n = 8$ ; ABX,  $n = 14$ ; Con vs. ABX, \*\*\*\*  $p < 0.0001$ ; data are mean  $\pm$  SEM; T test, two-tailed).

**g** Time percentages of pushing, voluntary retreating, resistance (when pushed by an opponent), and passive retreating (when pushed by an opponent) during tube test for microbiota-depleted mice before and after go-through-tube or forced loss procedure (Go-through-tube + ABX,  $n = 6$  mice, 18 trials; forced loss + ABX,  $n = 7$  mice, 21 trials. \* $p < 0.05$ , \*\* $p < 0.01$ , \*\*\* $p < 0.001$ , \*\*\*\* $p < 0.0001$ , ns, not significant; data are mean  $\pm$  SEM; Mann-Whitney test, two-tailed).

Supplementary Figure 2

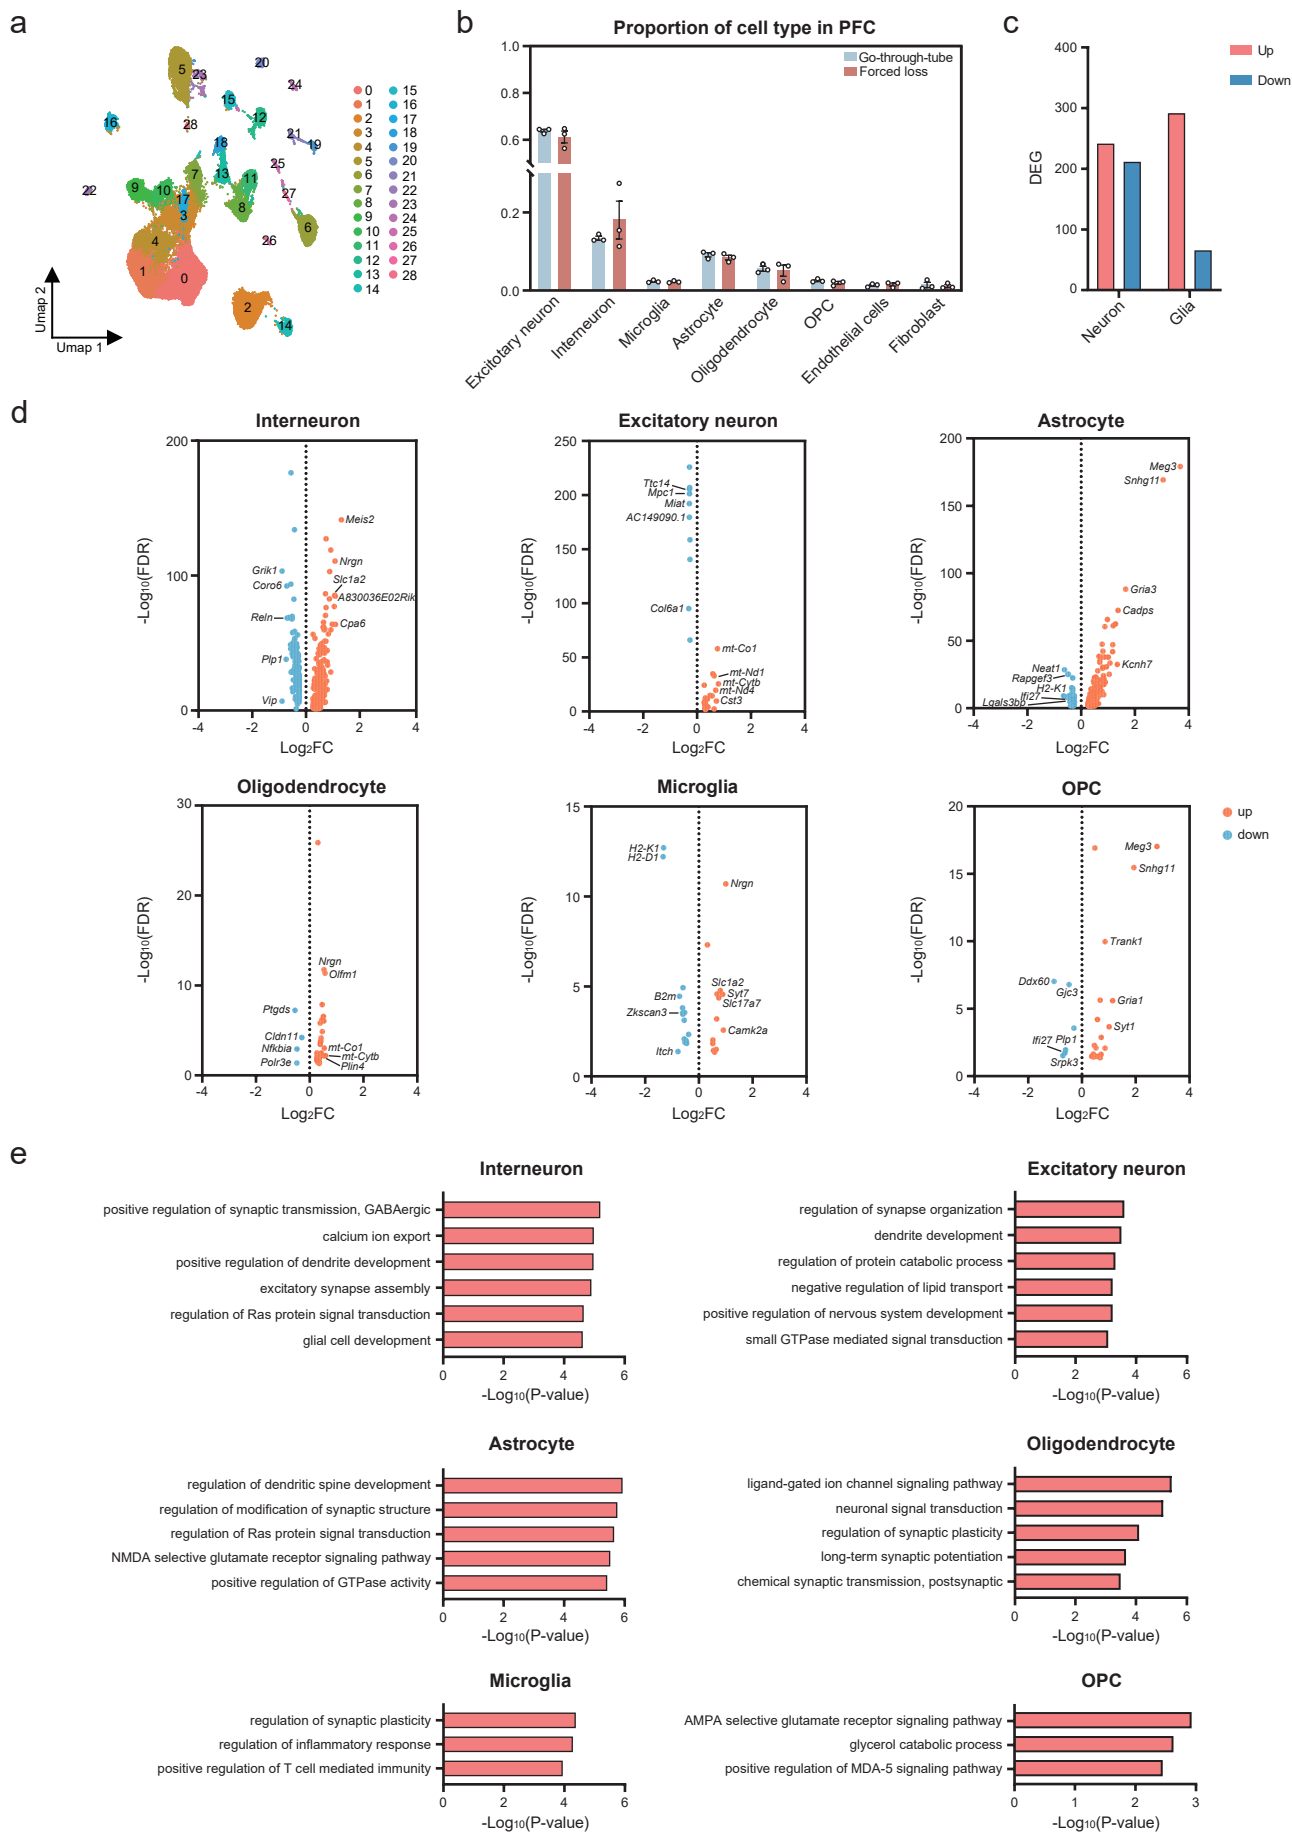

a

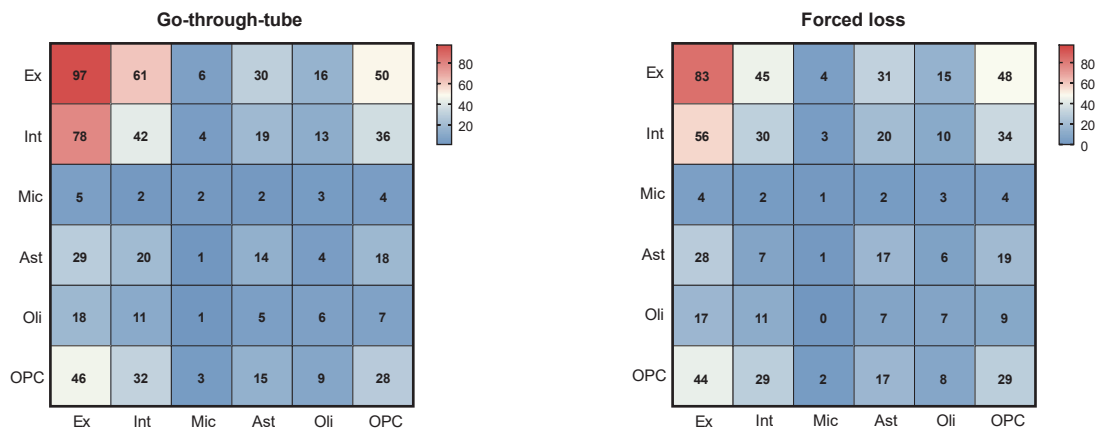

**b**

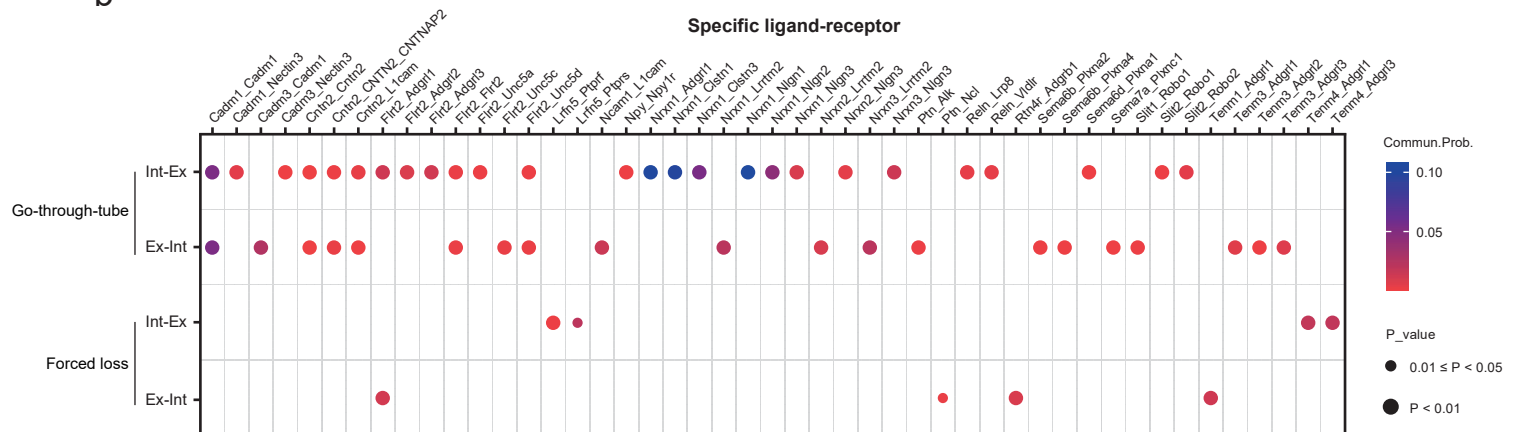

**Fig. S3: The number and specific function of ligand-receptor pairs in the go-through-tube and forced loss groups.**  
**a** The number of all activated ligand-receptor pairs in the go-through-tube and forced loss groups (Go-through-tube,  $n = 3$ ; Forced loss,  $n = 3$ ).  
**b** Functions of specific connections in the ligand-receptor relationships between interneurons and excitatory neurons ( $p < 0.05$ ).

Supplementary Figure 4

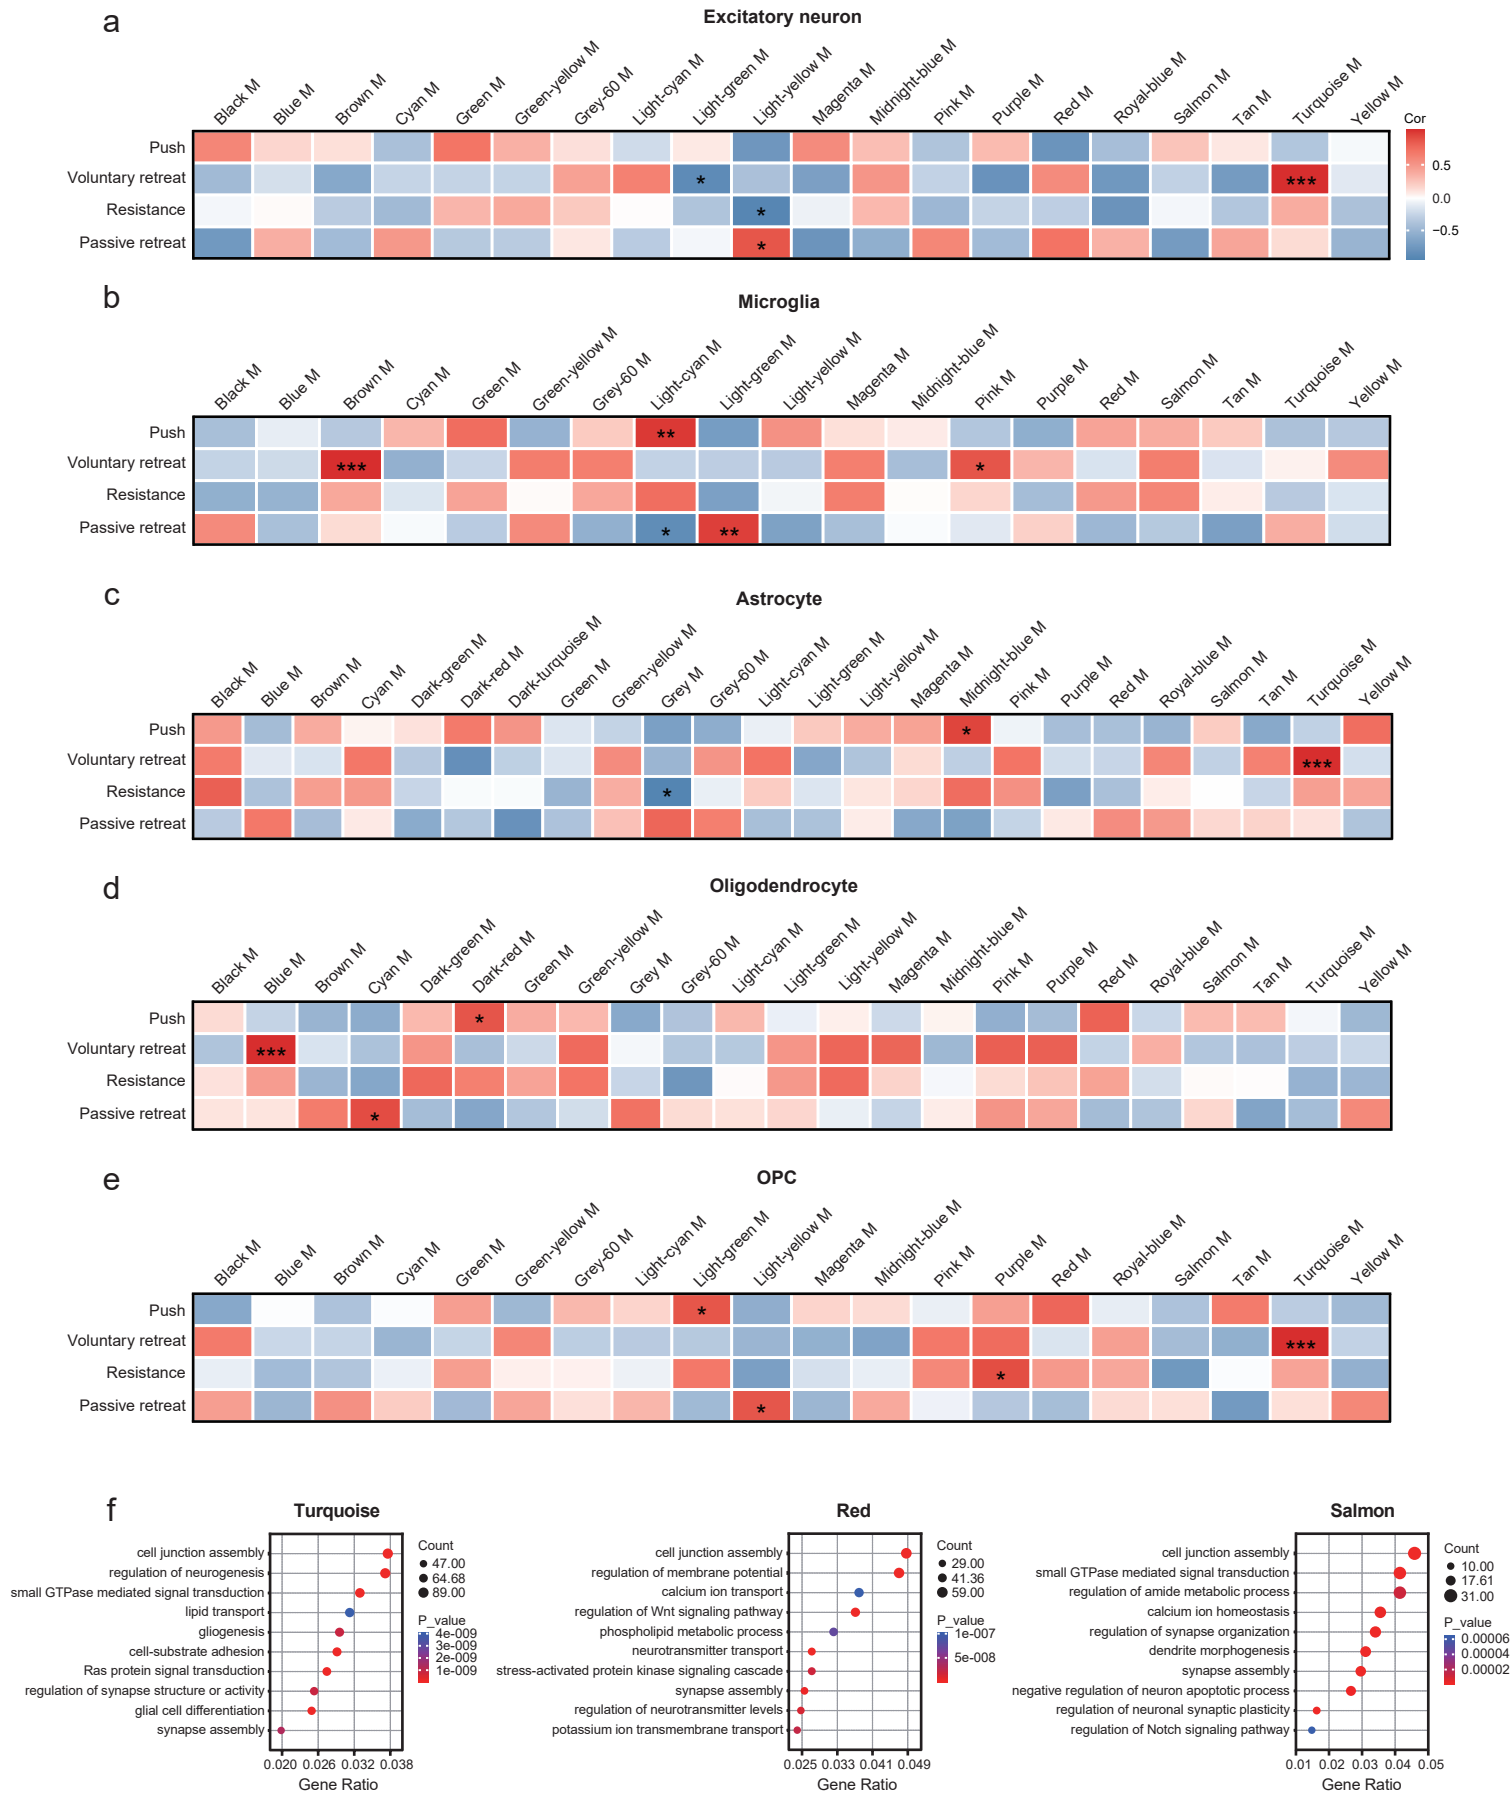

**Fig. S4: Correlation between gene modules of differential cell types and forced loss related behaviors.**  
**a-e** The heatmap showed gene modules associated with four behaviors (push, voluntary retreat, resistance, passive retreat) in excitatory neurons, microglia, astrocytes, oligodendrocytes and OPC ( $r > 0.6$  or  $< -0.6$ ,  $*p < 0.05$ ,  $**p < 0.01$ ,  $***p < 0.001$ , two-tailed Pearson correlation).  
**f** GO enrichment analysis showed the functions and pathways of genes enrichment in three modules (turquoise, red, salmon) associated with voluntary retreat in interneurons ( $p < 0.05$ ).
